# Supplementary material for: A nuclear permeable Ru(ii)-based photoactivated chemotherapeutic agent towards a series of cancer cells:in vitroandin vivostudies
Source: Royal Society of Chemistry journal article supplement (doi:10.1039/c9dt00441f), 2019-01-01
Supplement: c9dt00441f1.pdf [file c9dt00441f1.pdf]

## Supporting Information

### **A nuclear permeable Ru(II)-based photoactivated chemotherapeutic agent towards a series of cancer cells: in vitro and in vivo studies**

Na Tian<sup>a,b</sup>, Yang Feng<sup>a,b</sup>, Weize Sun<sup>a,b</sup>, Jian Lu<sup>a,b</sup>, Songsong Lu<sup>c</sup>, Yishan Yao<sup>c\*</sup>, Chao  
Li<sup>a</sup>, Xuesong Wang<sup>a,b\*</sup> and Qianxiong Zhou<sup>a,\*</sup>

*<sup>a</sup>Key Laboratory of Photochemical Conversion and Optoelectronic Materials, Technical Institute  
of Physics and Chemistry, Chinese Academy of Sciences, Beijing 100190, P. R. China.*

*<sup>b</sup>University of Chinese Academy of Sciences, Beijing 100049, P. R. China*

*<sup>c</sup>Beijing Institute of Pharmacology and Toxicology, Beijing 100850, P. R. China*

*\*E-mail addresses: [spray\\_yao123456@hotmail.com](mailto:spray_yao123456@hotmail.com) (Y. S. Yao), [xswang@mail.ipc.ac.cn](mailto:xswang@mail.ipc.ac.cn) (X. S.  
Wang), [zhouqianxiong@mail.ipc.ac.cn](mailto:zhouqianxiong@mail.ipc.ac.cn) (Q. X. Zhou)*

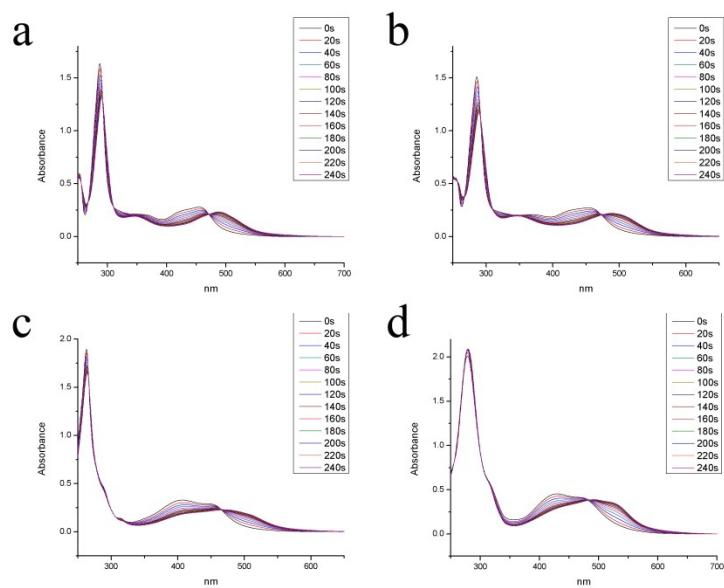

**Fig. S1 a-d:** absorption spectra changes of **1**, **2**, **3** and **4**(30 $\mu$ M) in H<sub>2</sub>O upon irradiation (470nm)

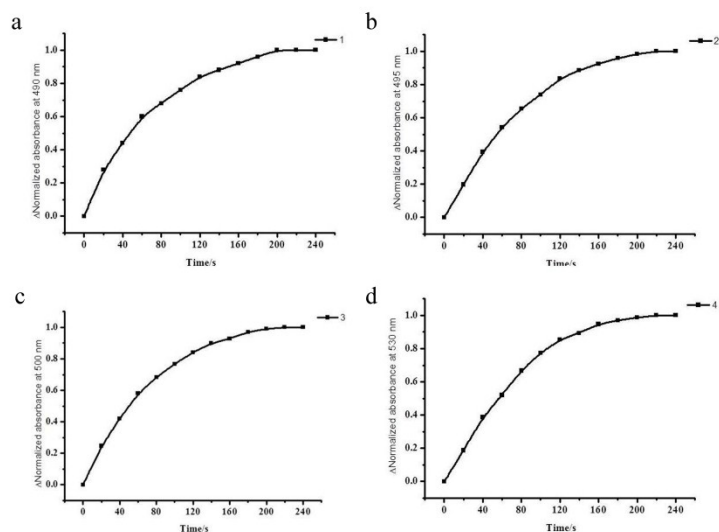

**Fig. S2 a-d:** absorbance changes at 490 nm for **1**, 495 nm for **2**, 500 nm for **3**, 530 nm for **4** with different irradiation times.

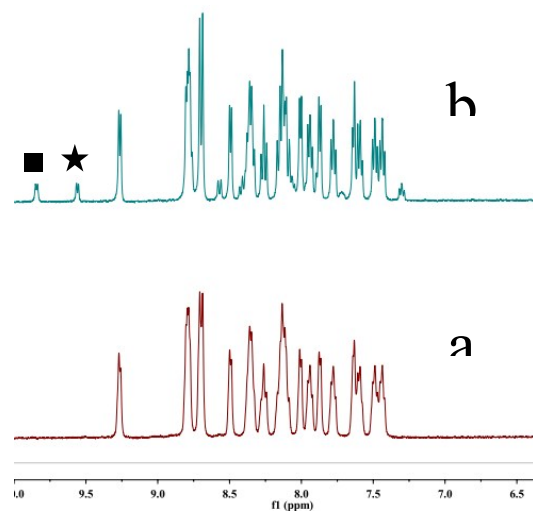

**Fig. S3**  $^1\text{H}$  NMR spectra changes of **1** in Ar-saturated  $\text{D}_2\text{O}$ : (a) before irradiation, (b) irradiation for 5 min ( $\lambda_{\text{irr}}=470$  nm). Two new peaks appeared at 9.56 ppm and 9.85 ppm, which was consistent with previous reports.<sup>6</sup> The H labeled with  $\star$  was assigned to bis-aquated complex, and mono-aquated complex was labeled by  $\blacksquare$ .

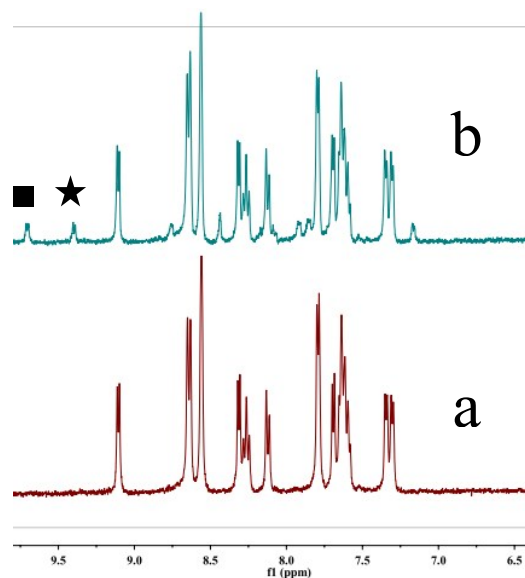

**Fig. S4**  $^1\text{H}$  NMR spectra changes of **2** in Ar-saturated  $\text{D}_2\text{O}$ : (a) before irradiation, (b) irradiation for 5 min ( $\lambda_{\text{irr}}=470$  nm). Similar with complex **1**, two new peaks were assigned to bis-aquated ( $\star$ ) and mono-aquated ( $\blacksquare$ ) complex, respectively.

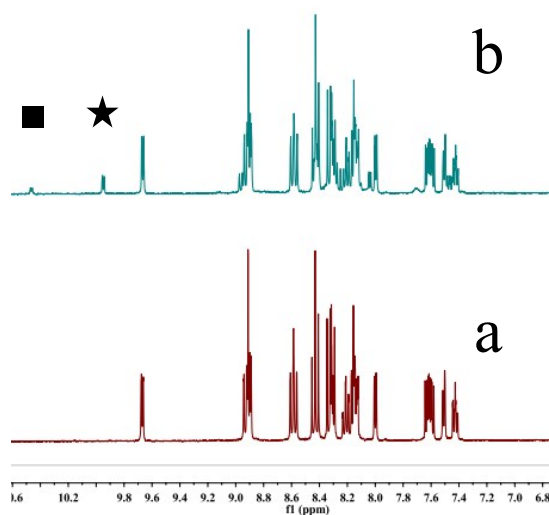

**Fig. S5**  $^1\text{H}$  NMR spectra changes of **3** in Ar-saturated  $\text{D}_2\text{O}$ : (a) before irradiation, (b) irradiation for 5 min ( $\lambda_{\text{irr}}=470$  nm). Similar with complex **1**, two new peaks were assigned to bis-aquated ( $\star$ ) and mono-aquated ( $\blacksquare$ ) complex, respectively.

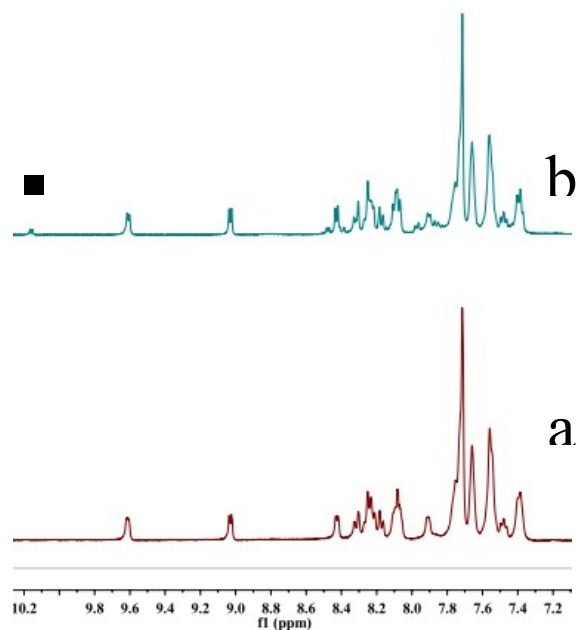

**Fig. S6**  $^1\text{H}$  NMR spectra changes of **4** in Ar-saturated  $\text{D}_2\text{O}$ : (a) before irradiation, (b) irradiation for 5 min ( $\lambda_{\text{irr}}=470$  nm). Only one new mono-aquated peak was observed (labeled by ■), which was also consistent with its relatively low photo-induced ligand dissociation quantum yield.

1

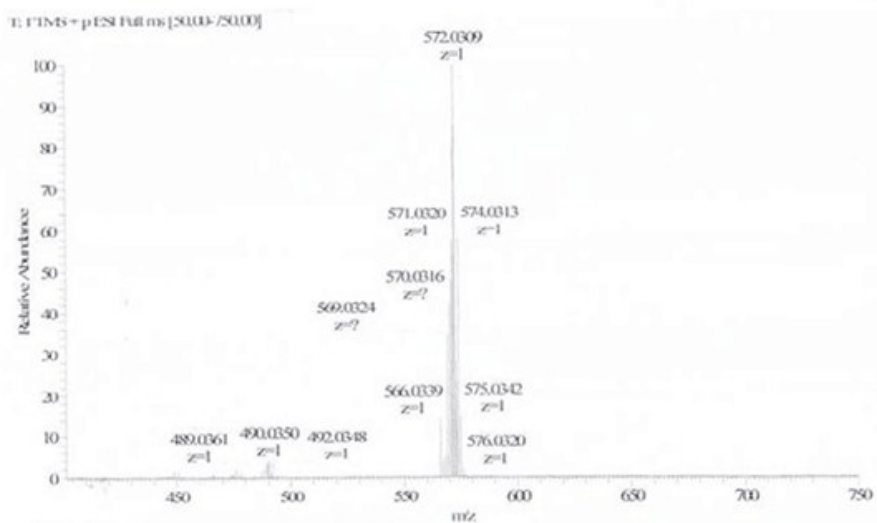

Analysis Name: tn-70 Acquisition Date: 8/27/2018  
 Comment: ESI Positive Operator: TIPC

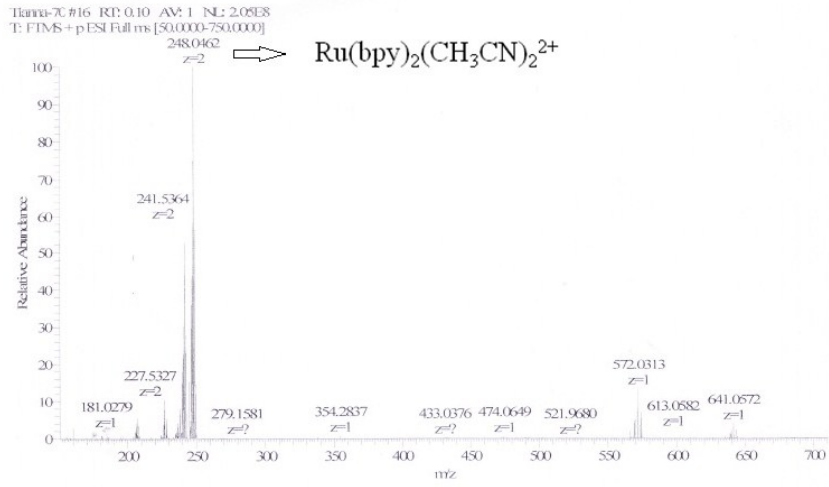

**Fig. S7** HR ESI-MS spectra of **1** before (top) and after 470 nm light irradiation (bottom) in  $\text{CH}_3\text{CN}$ .

2

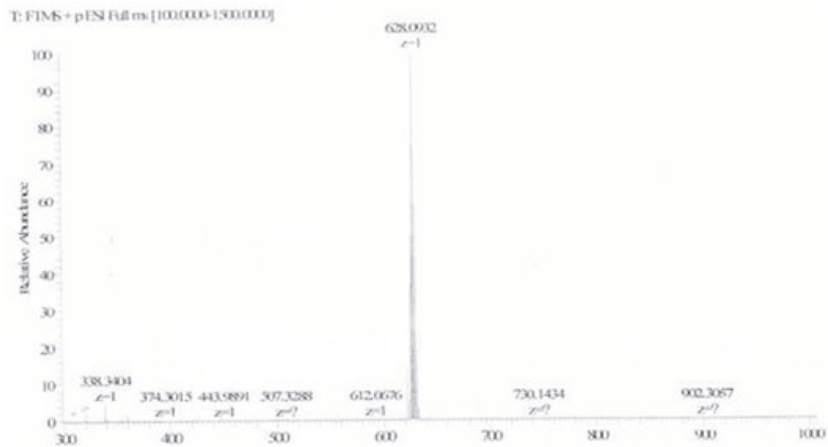

Analysis Name: tn-71 Acquisition Date: 8/27/2018  
Comment: ESI Positive Operator: TIPC

T: FIMS #20 RT: 0.12 AM: 1 NL: 7.88E8  
T: FIMS + pESI Full ms [50.000-750.0000]

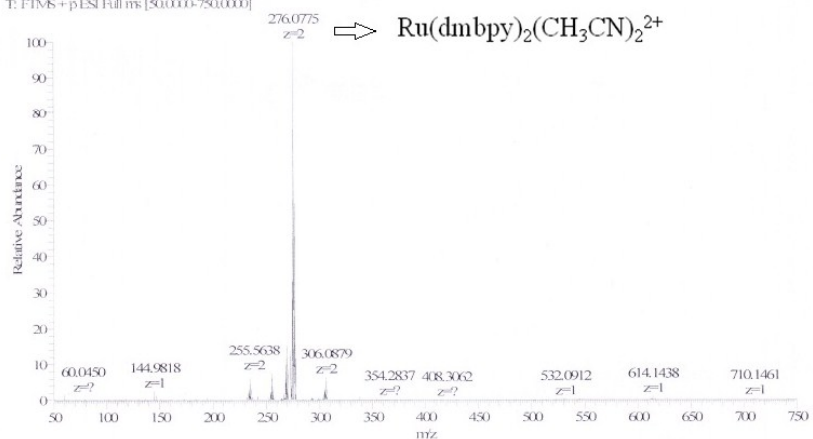

**Fig. S8** HR ESI-MS spectra of **2** before (top) and after 470 nm light irradiation (bottom) in CH<sub>3</sub>CN.

3

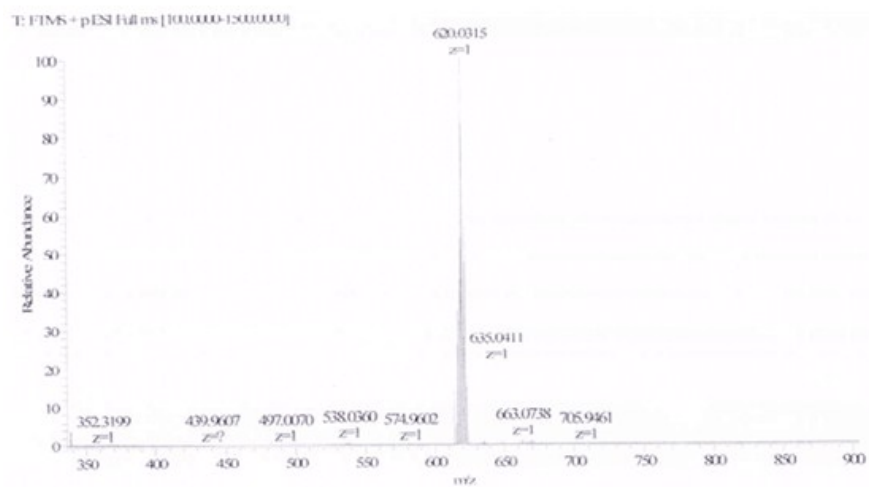

Analysis Name: tn-72 Acquisition Date: 8/27/2018  
 Comment: ESI Positive Operator: TIPC

TIC: tn-72 #21 RE: 0.13 AV: 1 NL: 3.74E8  
 T: FTMS+pESI Full ms [50.0000-750.0000]

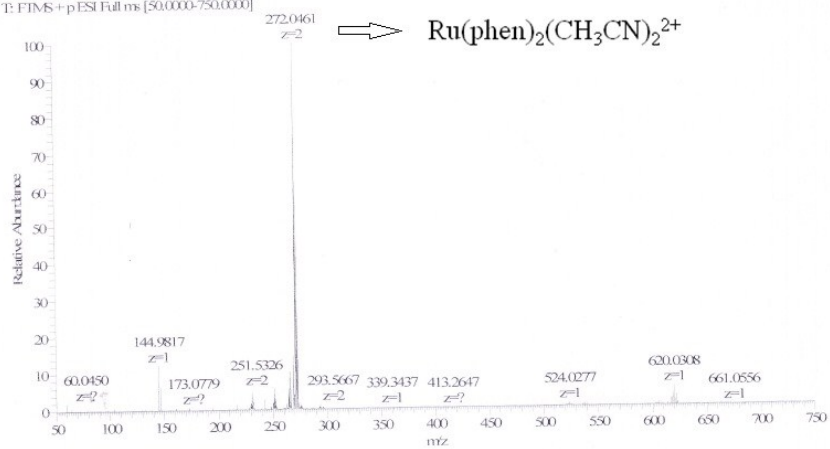

**Fig. S9** HR ESI-MS spectra of **3** before (top) and after 470 nm light irradiation (bottom) in CH<sub>3</sub>CN.

4

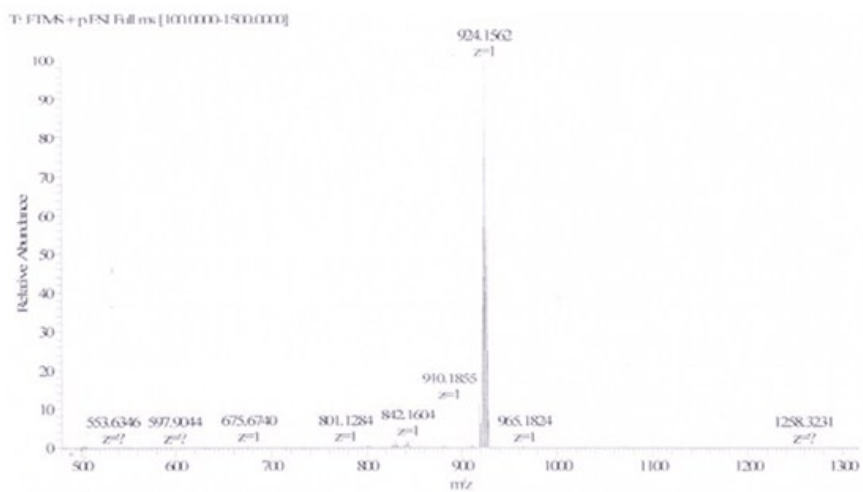

# ESI(P),Ru-2,20180831

|                              |                                             |                  |                          |
|------------------------------|---------------------------------------------|------------------|--------------------------|
| <b>Analysis Info</b>         |                                             | Acquisition Date | 8/31/2018 9:27:43 AM     |
| Analysis Name                | D:\Data\ESI\2018\2018-08\0831\Ru-2_000002.d | Operator         |                          |
| Sample Name                  | Ru-2                                        | Instrument       | solarix                  |
| <b>Acquisition Parameter</b> |                                             |                  |                          |
| Polarity                     | Positive                                    | Calibration Date | Wed Aug 15 09:53:22 2018 |
| Broadband Low Mass           | 101.1 m/z                                   | Acquired Scans   | 3                        |
| Broadband High Mass          | 600.0 m/z                                   |                  |                          |

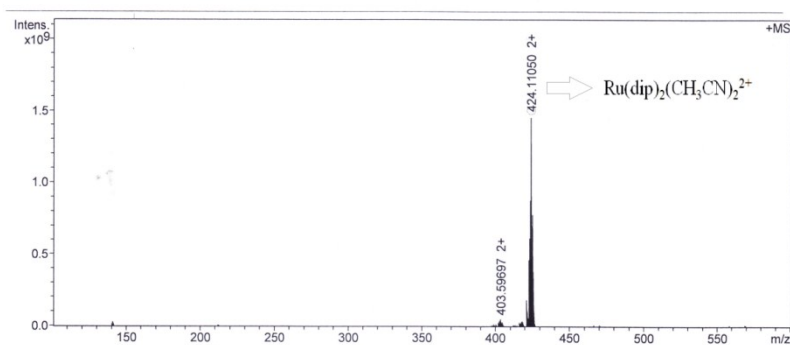

**Fig. S10** HR ESI-MS spectra of **4** before (top) and after 470 nm light irradiation (bottom) in CH<sub>3</sub>CN.

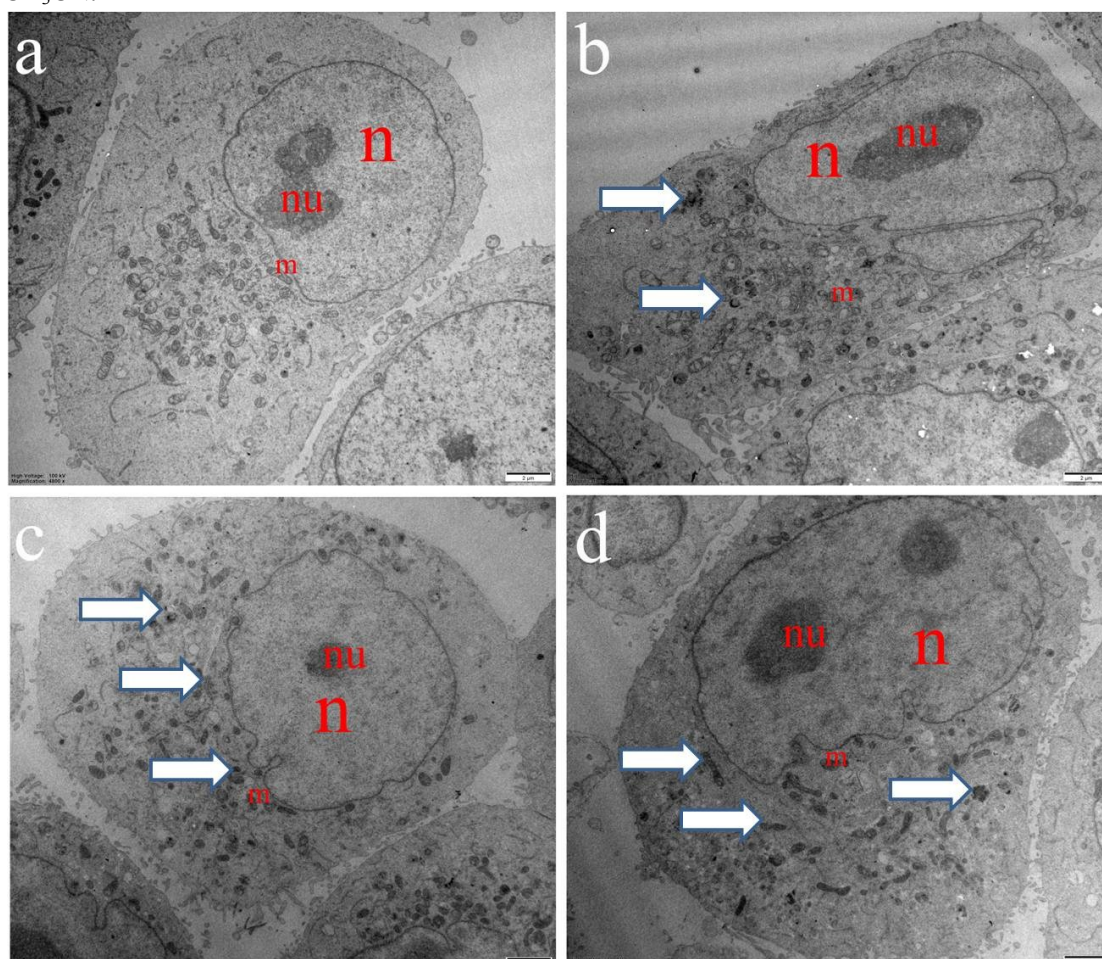

**Fig. S11** TEM images of SKOV-3 cells incubated with control (a), **1**(b), **2**(c), **3** (d) and stained with osmium tetroxide, (The white arrows indicated the accumulated Ru complex, n=nucleus, nu=nucleolus, m=mitochondria ).



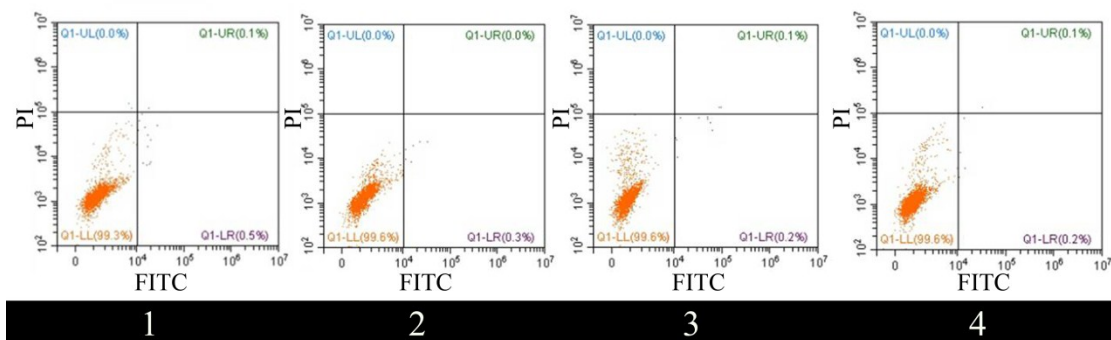

**Fig. S12** The percentage of apoptotic SKOV-3 cells analyzed by flow cytometry. (1) Dark control, with no complex added; (2-4) SKOV-3 cells incubated with complex 1-3(100nM) for 4 h, respectively, cell medium discarded and added with fresh medium, then irradiated for 0.5 h (470nm LED, 22.5mW/cm<sup>2</sup>), and incubated for more 10 h in the dark.

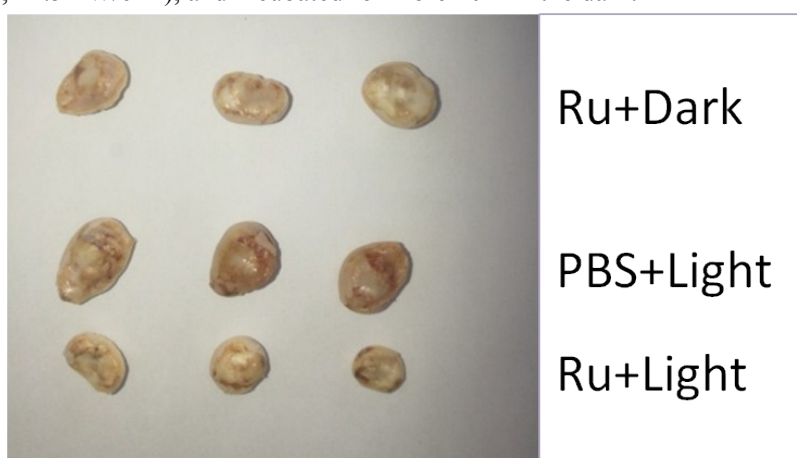

**Fig. S13** Solid tumors extracted from mice treated after 12 days.

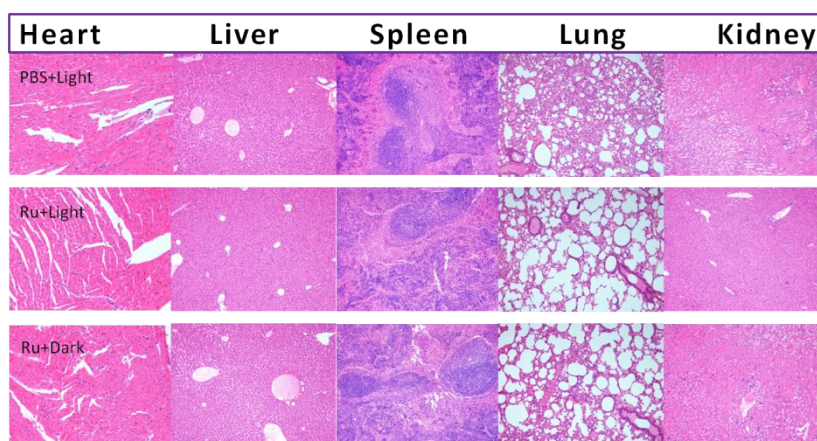

**Fig. S14** H&E staining images of important organs of different groups: PBS+light, Ru+Light, Ru+dark groups after 12 days treatment.

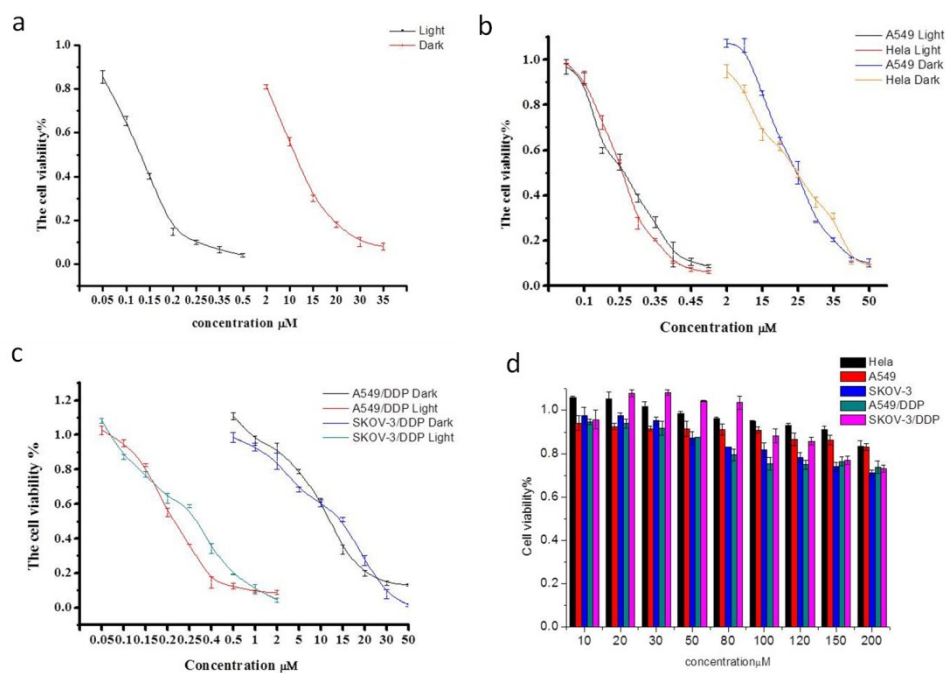

**Fig. S15** Partial MTT assays of different cells. (a) SKOV-3 Cell viabilities treated with complex 4; (b) A549 and Hela cell viabilities treated with complex 4; (c) A549 DDP and SKOV-3 DDP cells viabilities treated with complex 4; (d) Cell viabilities treated with complex 3 upon irradiation for 30 min using 470 nm LED (22.5 mW/cm<sup>2</sup>).

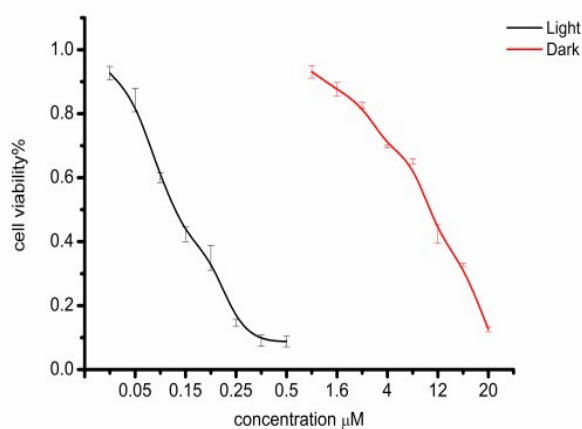

**Fig. S16** MTT assays of normal L-02 cells. Cells treated with complex 4 upon irradiation for 30 min using 470 nm LED (22.5 mW/cm<sup>2</sup>) or in the dark.

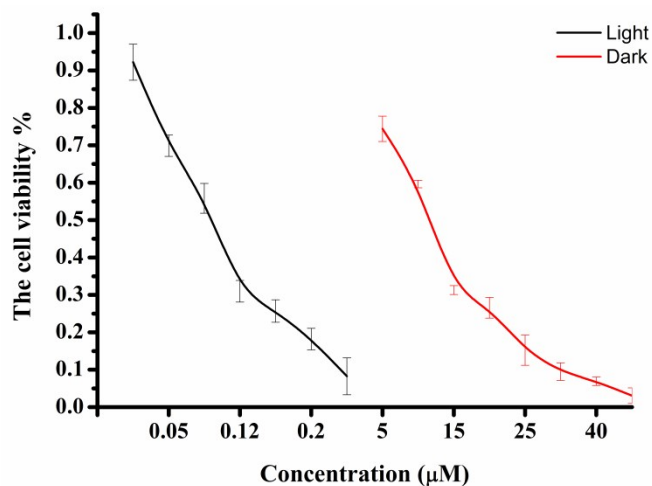

**Fig. S17** MTT assays of SKOV-3 cells under hypoxia condition. Cells treated with complex 4 upon irradiation for 30 min using 470 nm LED (22.5 mW/cm<sup>2</sup>) or in the dark.

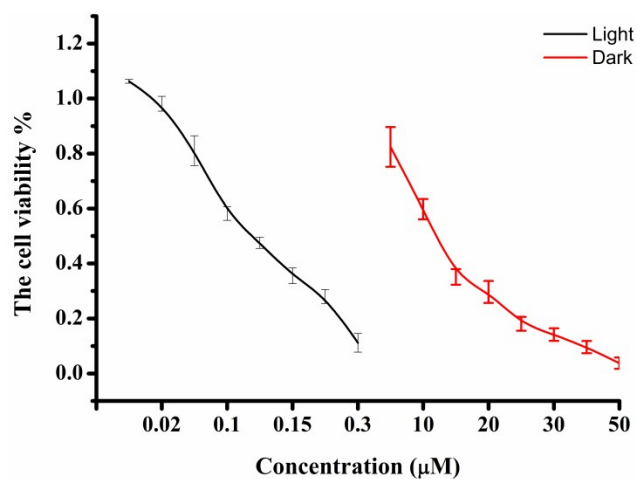

**Fig. S18** MTT assays of 4T1 cells. Cells treated with complex 4 upon irradiation for 30 min using 470 nm LED (22.5 mW/cm<sup>2</sup>) or in the dark.

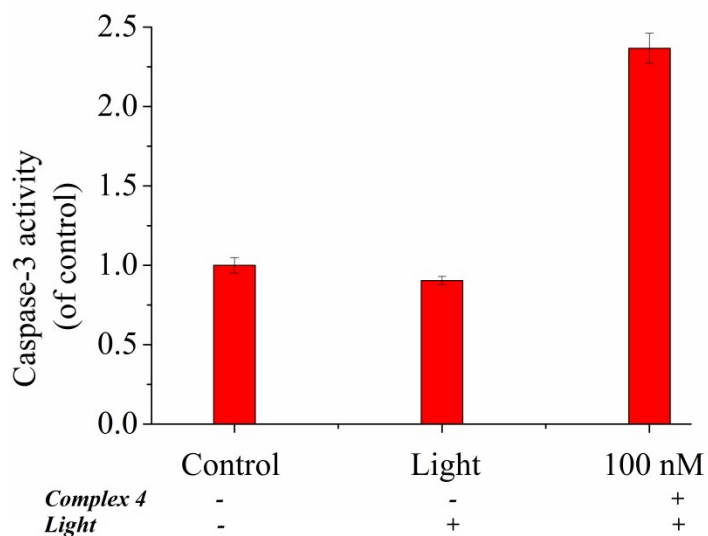

**Fig. S19** Caspase levels of SKOV-3 cells relative to the control.

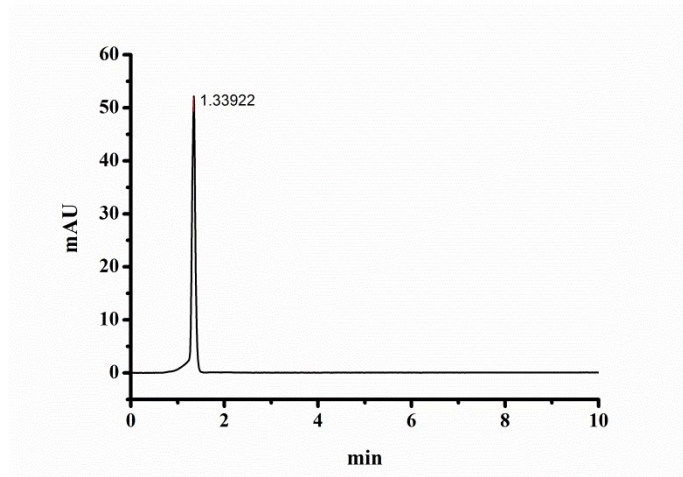

**Fig. S20** HPLC of 1.

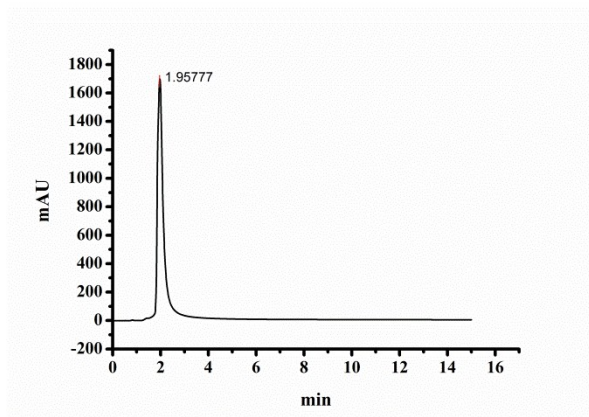

**Fig. S21** HPLC of 2.

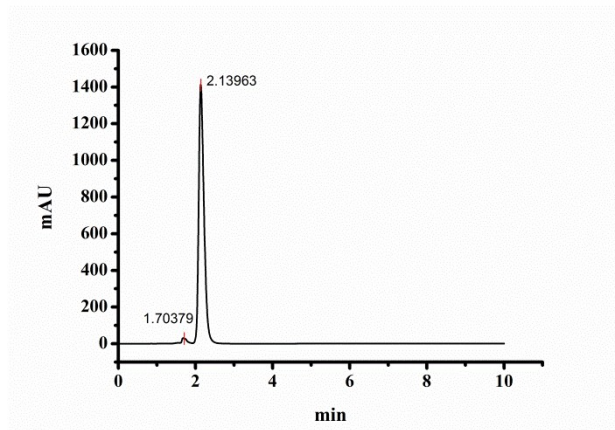

**Fig. S22** HPLC of 3.

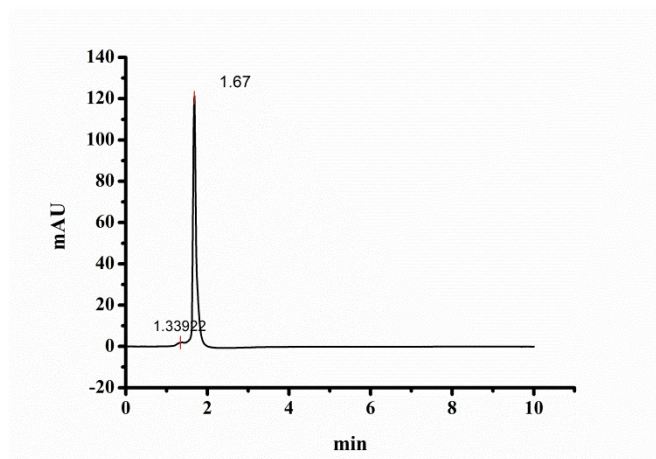

**Fig. S23** HPLC of **4**.
